# Supplementary material for: Ultra-Low-Cost 3D Bioprinting: Modification and Application of an Off-the-Shelf Desktop 3D-Printer for Biofabrication
Source: PubMed Central journal article supplement (PMC6684753; doi:10.3389/fbioe.2019.00184), 2019-07-31
Supplement: Data_Sheet_2.pdf [file Data_Sheet_2.pdf]

# Ultra-low-cost 3D bioprinting: Modification & application of an off-the-shelf desktop 3D-printer for biofabrication

Melanie Kahl<sup>a+</sup>, Phillip Hoyer<sup>a+</sup>, Oliver Friedrich<sup>a</sup> and Daniel F. Gilbert<sup>\*a</sup>

<sup>a</sup> Institute of Medical Biotechnology, Friedrich-Alexander-University Erlangen-Nürnberg, Erlangen, Germany.

\* Correspondence to: Dr. Daniel Gilbert, Institute of Medical Biotechnology, FAU Erlangen-Nuremberg, Erlangen, Germany, [daniel.gilbert@fau.de](mailto:daniel.gilbert@fau.de)

+ contributed equally

## Supplementary Information

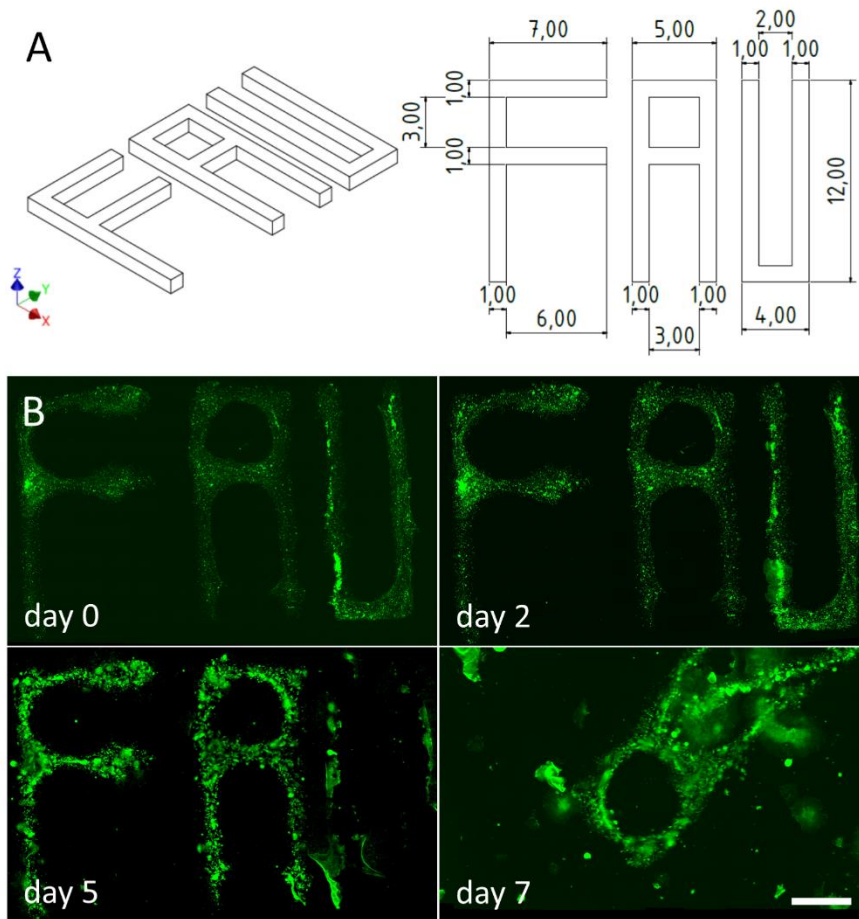

**Figure S1. Maturation of 3D printed recombinant HEK293<sup>YFP</sup> cell-laden alginate-hydrogel.** **A.** Three-dimensional representation (left) and dimensions (right) of a bio-construct shown in (B) and printed with our ultra-low-cost 3D-bioprinter. The letters FAU abbreviate Friedrich-Alexander-University Erlangen-Nuremberg. **B.** Reconstructed fluo-micrographs of the printed structure shown in (A) after 0, 2, 5 and 7 days *in vitro* maturation, respectively, indicating cellular proliferation and viability within the bio-construct. These data further demonstrate the suitability of the in house-modified system for biomedical research. The large structure dislodges, disintegrates and floats in the culture medium after approx. 5 days in culture due to weak attachment to the glass coverslip, followed by. Scale bar: 3 mm.

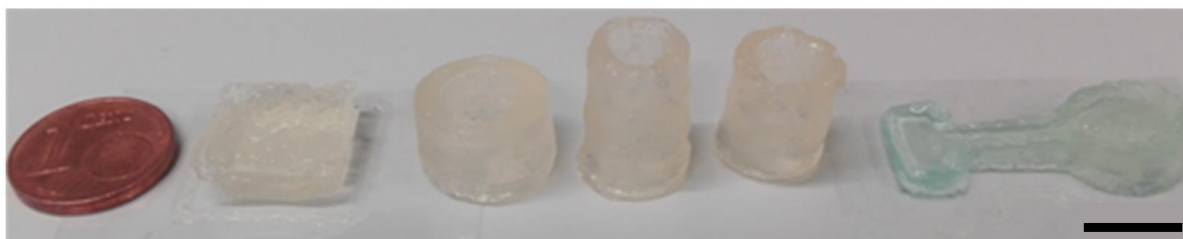

**Figure S2. Examples of printed objects further highlighting the applicability of the in house-modified system for fabrication of 3D constructs. From left to right: one euro cent for comparison; half-cut and upside-down pyramid; cylinders of different diameters and heights; spoon-shaped objects. Scale bar: 10 mm.**

**Table S1. Detailed parts list**

| Part              | File name / DIN                  | No. | Dimensions | Material [g] | Printing time [hour:min] |
|-------------------|----------------------------------|-----|------------|--------------|--------------------------|
| Connector         | Slider for plunger               | 1   |            | 27.64        | 2:33                     |
|                   | Hold carriage to carriage        | 1   |            | 5.06         | 0:30                     |
|                   | Motor connector adapter          | 1   |            | 15.01        | 1:28                     |
|                   | Motor connector                  | 1   |            | 9.99         | 1:02                     |
|                   | Screws DIN EN ISO 4762           | 4   | M3x60      |              |                          |
|                   | Screws switch DIN 912            | 2   | M2x10      |              |                          |
| Carriage          | Slider BOTTOM                    | 1   |            | 1.67         | 0:08                     |
|                   | Slider LARGE                     | 1   |            | 2.52         | 0:16                     |
|                   | Slider SMALL                     | 1   |            | 2.87         | 0:18                     |
|                   | Square nut DIN 557               | 2   | M5         |              |                          |
|                   | Screw DIN EN 24017               | 4   | M3x20      |              |                          |
|                   | Nut DIN EN 24036                 | 4   | M3         |              |                          |
| Plunger connector | Plunger connector TOP            | 1   |            | 2.67         | 0:17                     |
|                   | Plunger connector BOTTOM         | 1   |            | 1.53         | 0:11                     |
|                   | Plunger connector LID            | 1   |            | 0.31         | 0:04                     |
|                   | Screw DIN EN ISO 4762            | 2   | M3x16      |              |                          |
|                   | Nut DIN EN 24036                 | 3   | M3         |              |                          |
|                   | Thumb screw DIN 653              | 1   | M3x16      |              |                          |
| Syringe carrier   | Syringe carrier BOTTOM           | 1   |            | 2.00         | 0:29                     |
|                   | Syringe carrier MIDDLE           | 1   |            | 3.99         | 0:20                     |
|                   | Syringe carrier TOP              | 1   |            | 3.51         | 0:17                     |
|                   | Syringe carrier LEVER            | 2   |            | 0.21         | 0:02                     |
|                   | Screw DIN EN ISO 4762            | 2   | M3x25      |              |                          |
|                   | Nut DIN EN 24036                 | 2   | M3         |              |                          |
| Misc              | Flexible Helical Coupling        | 1   | M5/M8      |              |                          |
|                   | Stepper motor                    | 1   |            |              |                          |
|                   | Threaded rod                     | 1   | M5x125     |              |                          |
|                   | Screw printer connector ISO 7380 | 4   | M5x6       |              |                          |
